# Supplementary material for: Geometric and electronic properties of ultrathin anatase TiO2(001) films
Source: Royal Society of Chemistry journal article supplement (doi:10.1039/c7cp05416e), 2017-01-01
Supplement: c7cp05416e1.pdf [file c7cp05416e1.pdf]

## Supplementary Information

### Geometric and electronic properties of the ultrathin anatase $\text{TiO}_2$ (001) films

Xiangchao Ma<sup>1</sup>, Xin Wu<sup>1</sup>, Xunwang Zhao<sup>2</sup> and Hao Sun<sup>1</sup>

1. School of Physics and Optoelectronic Engineering, Xidian University, Xi'an,  
710071, China

2. School of Electronic Engineering, Xidian University, Xi'an, 710071, China

\*Correspondence to: xwu@xidian.edu.cn; xwzhao@mail.xidian.edu.cn

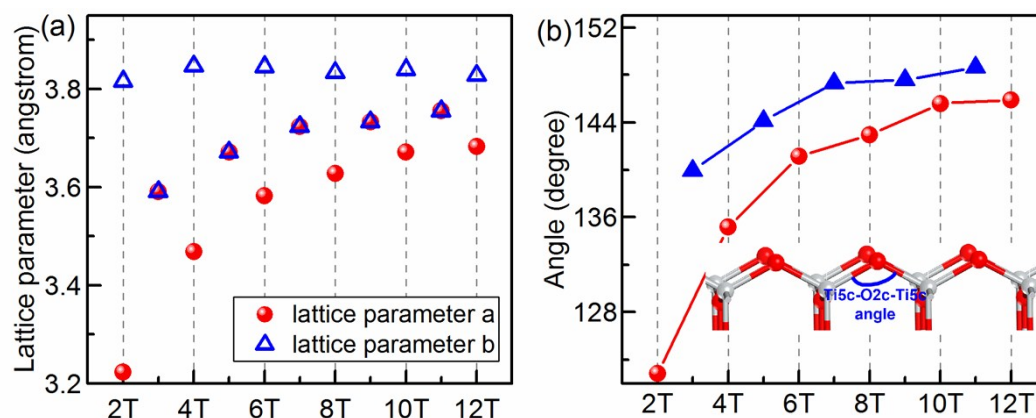

Figure S1. Calculated (a) lattice parameters and (b) surface  $\text{Ti5c-O2c-Ti5c}$  angles with the PBE-D2 functional. The films with 2 to 12 trilayers are denoted respectively by 2T to 12T.

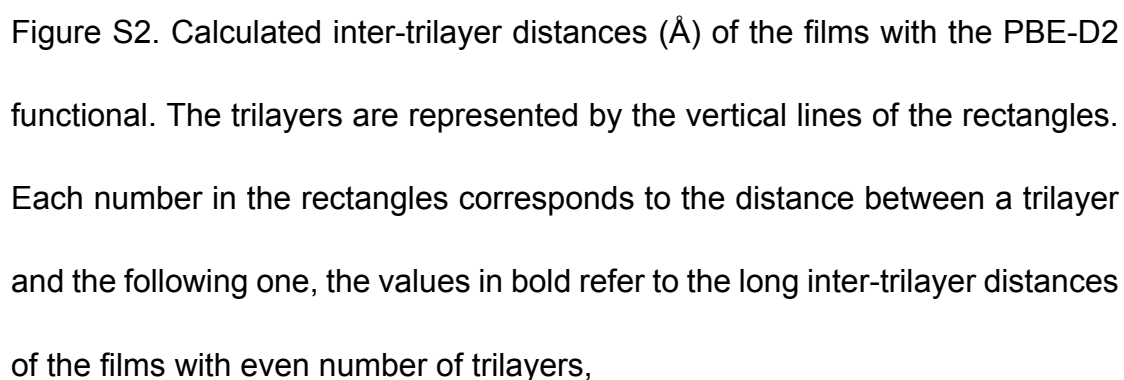

Figure S2. Calculated inter-trilayer distances (Å) of the films with the PBE-D2 functional. The trilayers are represented by the vertical lines of the rectangles. Each number in the rectangles corresponds to the distance between a trilayer and the following one, the values in bold refer to the long inter-trilayer distances of the films with even number of trilayers,
